# Supplementary material for: Educational Inequalities in COVID-19 Vaccination: A Cross-Sectional Study of the Adult Population in the Lazio Region, Italy
Source: MDPI journal article supplement (doi:10.3390/vaccines10030364), 2022-02-25
Supplement: s1 [file s1]

**Table S1.** Characteristics of the study population included and not included in the study according to vaccination status on 22<sup>nd</sup> December 2021.

|                                     | Included subjects |      |                                       |                       |                         | Not-included subjects |      |                                                   |                       |                         |
|-------------------------------------|-------------------|------|---------------------------------------|-----------------------|-------------------------|-----------------------|------|---------------------------------------------------|-----------------------|-------------------------|
|                                     | N                 | %    | % Vaccination in the study population |                       |                         | N                     | %    | % Vaccination in subjects excluded from the study |                       |                         |
|                                     |                   |      | % No vaccination                      | % Partial vaccination | % Completed vaccination |                       |      | % No vaccination                                  | % Partial vaccination | % Completed vaccination |
| <b>Total</b>                        | 3,186,728         | 100  | 10.3                                  | 1.5                   | 88.1                    | 438,049               | 100  | 27.1                                              | 2.5                   | 70.4                    |
| <b>Sex</b>                          |                   |      |                                       |                       |                         |                       |      |                                                   |                       |                         |
| Men                                 | 1,467,434         | 46.0 | 10.0                                  | 1.5                   | 88.4                    | 206,793               | 47.2 | 26.9                                              | 2.5                   | 70.5                    |
| Women                               | 1,719,294         | 54.0 | 10.6                                  | 1.5                   | 87.9                    | 231,256               | 52.8 | 27.3                                              | 2.4                   | 70.2                    |
| <b>Age, mean (sd)</b>               | 58.9 (14.3)       |      | 56.2 (14.8)                           | 53.8 (13.9)           | 59.3 (14.2)             | 52.7 (13.9)           |      | 52.9 (14.2)                                       | 48.7 (11.8)           | 52.7 (13.8)             |
| <b>Place of birth</b>               |                   |      |                                       |                       |                         |                       |      |                                                   |                       |                         |
| Italy                               | 2,931,917         | 92.0 | 9.0                                   | 1.5                   | 89.5                    | 273,981               | 62.5 | 19.6                                              | 2.5                   | 77.9                    |
| Other Countries                     | 254,811           | 8.0  | 25.4                                  | 2.1                   | 72.5                    | 164,068               | 37.5 | 39.7                                              | 2.5                   | 57.8                    |
| <b>Number of chronic conditions</b> |                   |      |                                       |                       |                         |                       |      |                                                   |                       |                         |
| 0                                   | 1,597,725         | 50.1 | 13.0                                  | 1.9                   | 85.1                    | 300,042               | 68.5 | 31.6                                              | 2.7                   | 65.7                    |
| 1                                   | 738,096           | 23.2 | 8.5                                   | 1.3                   | 90.2                    | 73,356                | 16.7 | 19.1                                              | 2.3                   | 78.6                    |
| 2                                   | 403,689           | 12.7 | 7.1                                   | 1.1                   | 91.8                    | 32,316                | 7.4  | 15.9                                              | 1.9                   | 82.3                    |
| 3+                                  | 447,218           | 14.0 | 6.7                                   | 1.0                   | 92.4                    | 32,335                | 7.4  | 14.9                                              | 1.6                   | 83.5                    |
| <b>Deprivation quantile</b>         |                   |      |                                       |                       |                         |                       |      |                                                   |                       |                         |
| Q1                                  | 647,691           | 20.3 | 9.2                                   | 1.3                   | 89.5                    | 92,302                | 21.1 | 26.2                                              | 2.3                   | 71.5                    |
| Q2                                  | 642,586           | 20.2 | 9.7                                   | 1.4                   | 88.9                    | 85,458                | 19.5 | 25.6                                              | 2.4                   | 72.0                    |
| Q3                                  | 637,238           | 20.0 | 10.0                                  | 1.5                   | 88.5                    | 80,184                | 18.3 | 25.5                                              | 2.3                   | 72.2                    |
| Q4                                  | 627,070           | 19.7 | 10.7                                  | 1.6                   | 87.8                    | 81,555                | 18.6 | 27.0                                              | 2.6                   | 70.4                    |
| Q5                                  | 616,831           | 19.4 | 11.9                                  | 1.8                   | 86.4                    | 91,793                | 21.0 | 28.4                                              | 2.8                   | 68.8                    |
| m.i.                                | 15,312            | 0.5  | 29.5                                  | 1.7                   | 68.8                    | 6,757                 | 1.5  | 64.3                                              | 2.1                   | 33.6                    |
