# Supplementary figures and images for: Educational Inequalities in COVID-19 Vaccination: A Cross-Sectional Study of the Adult Population in the Lazio Region, Italy
Source: MDPI journal article supplement (doi:10.3390/vaccines10030364), 2022-02-25

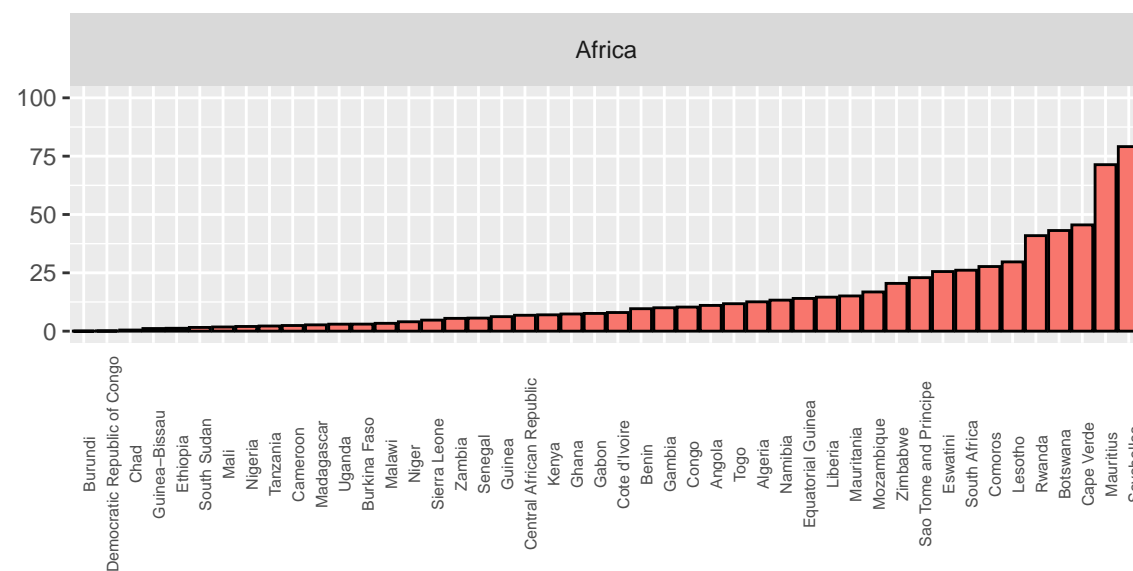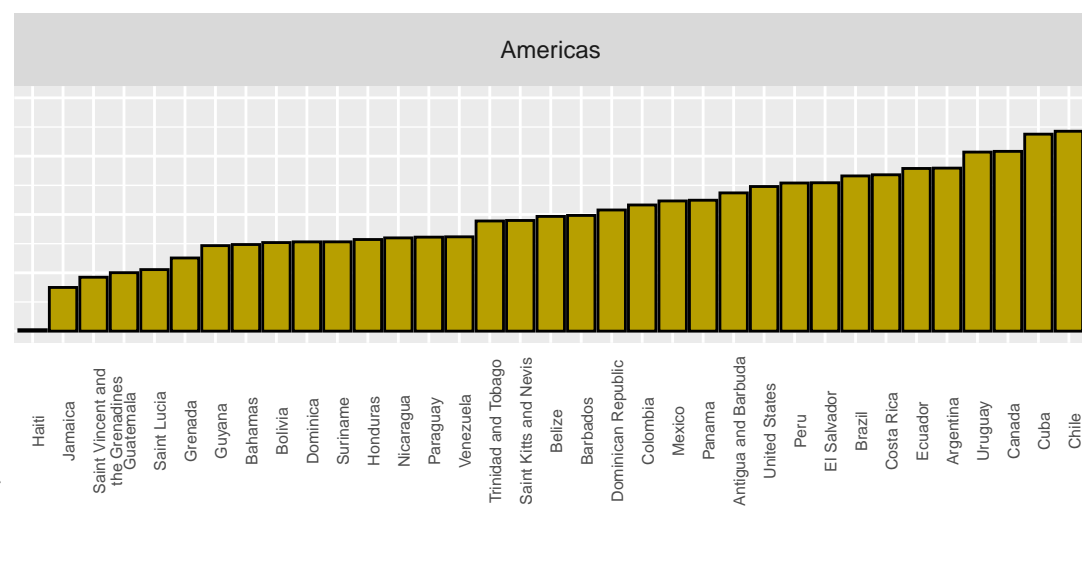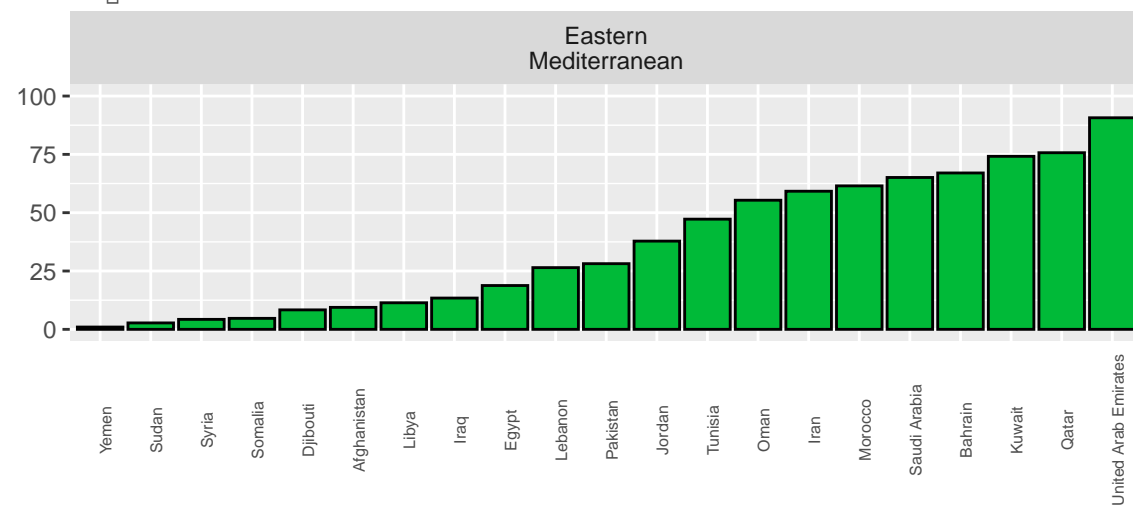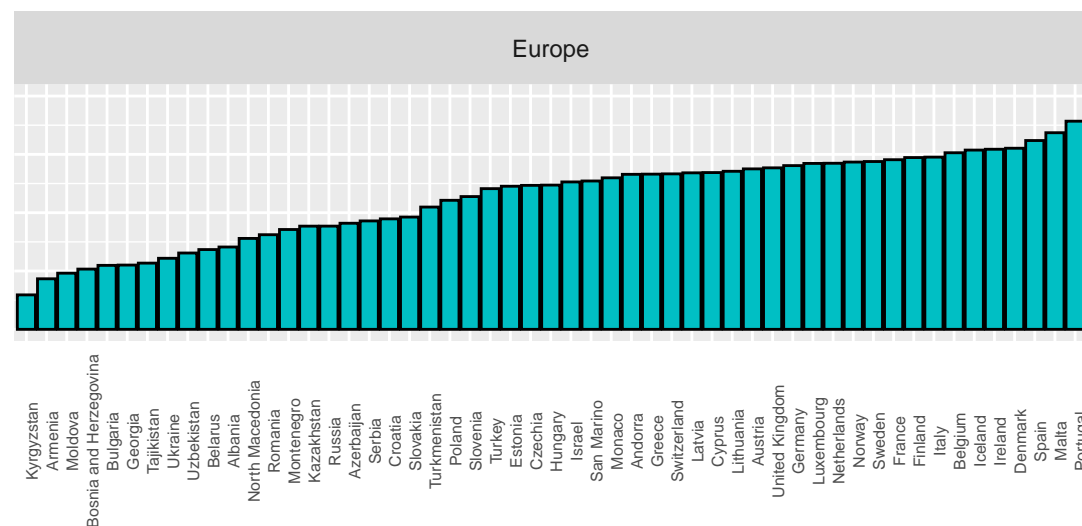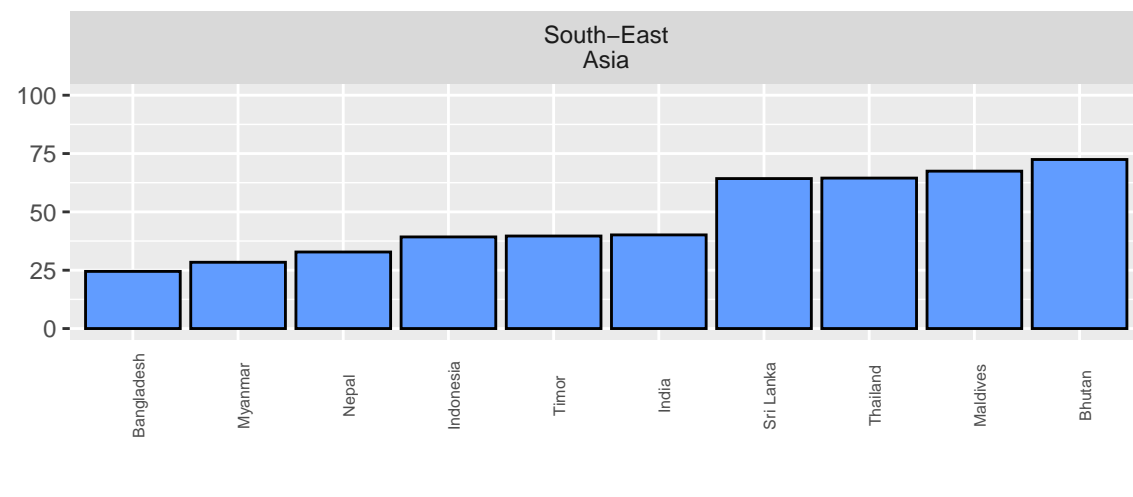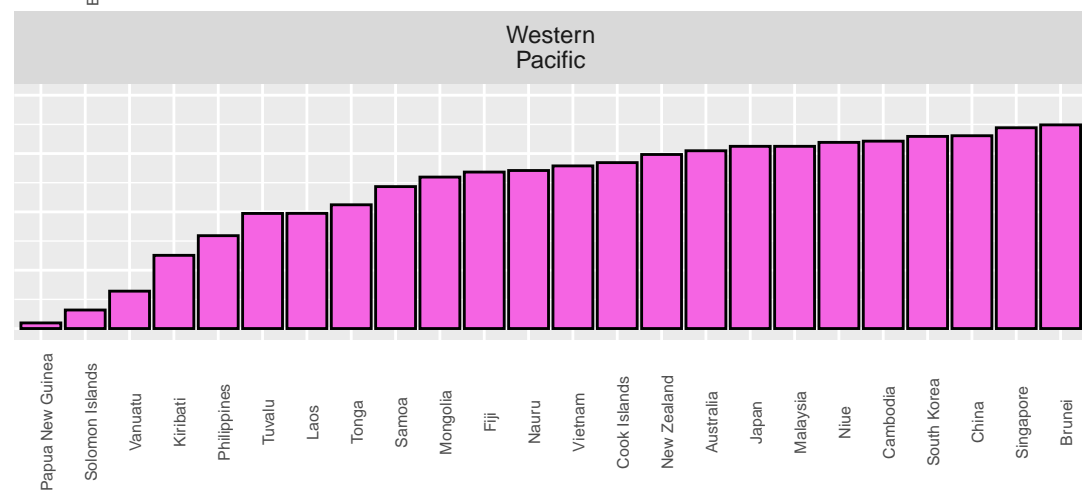

Supplement: s1 [file s1]
